# Supplementary material for: A fluorescence-based colorimetric droplet platform for biosensor application to the detection of α-fetoprotein
Source: Royal Society of Chemistry journal article supplement (doi:10.1039/c2an36111f), 2012-01-01
Supplement: c2an36111f.pdf [file c2an36111f.pdf]

## Supplementary information for

# Fluorescence-Based Colorimetric Droplet Platform Applied in the Biosensor for the Detection of $\alpha$ -Fetoprotein

Xia Xiang, Lu Chen, Cuiling Zhang, Ming Luo, Xinghu Ji, and Zhike He\*  
Key Laboratory of Analytical Chemistry for Biology and Medicine (Ministry of Education), College of Chemistry and Molecular Sciences, Wuhan University, Wuhan 430072, P. R. China.

Tel: +86-27-6875-6557; fax: +86-27-6875-4067.

E-mail address: zhkhe@whu.edu.cn

### Supplementary Figure S1

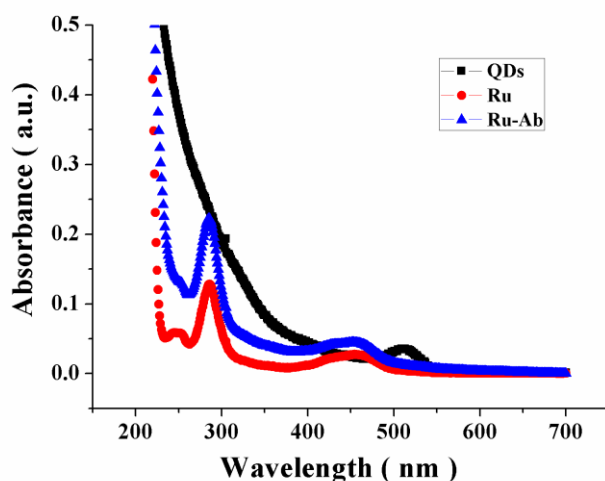

**Fig. S1** UV-vis spectra of NAC-capped CdTe QDs, Ru and Ru-Ab. All solutions were prepared in

15 mM PBS buffer at pH 8.0.

## Supplementary Figure S2

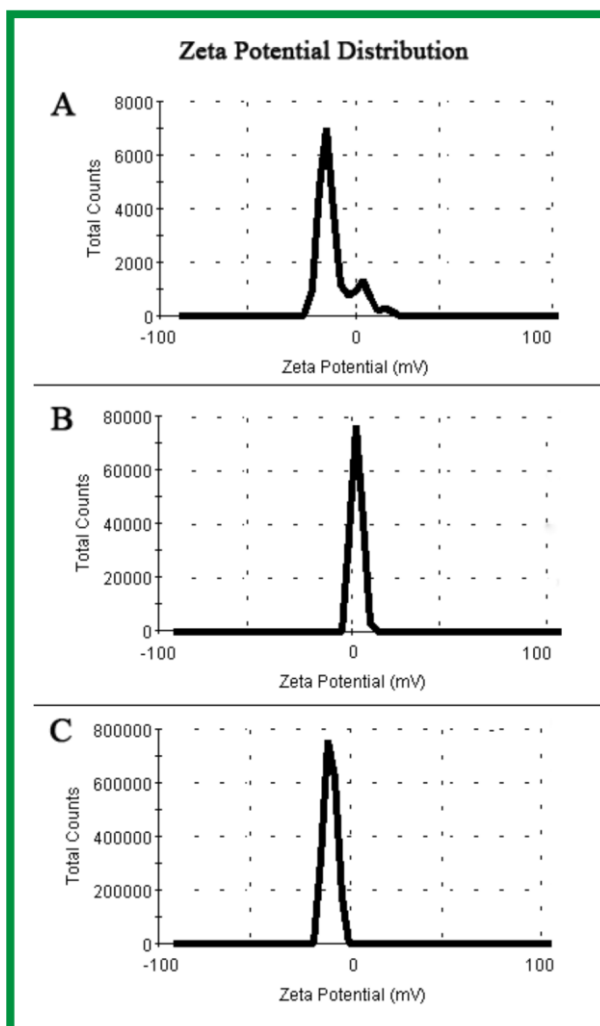

**Fig. S2** The zeta potential of QDs, Ru-Ab and Ru-Ab-AFP from A to C. The concentrations of QDs, Ru-Ab and AFP were  $3 \times 10^{-8}$  M, 1.5  $\mu\text{g/ml}$  and 75 ng/ml, respectively.

### Supplementary Figure S3

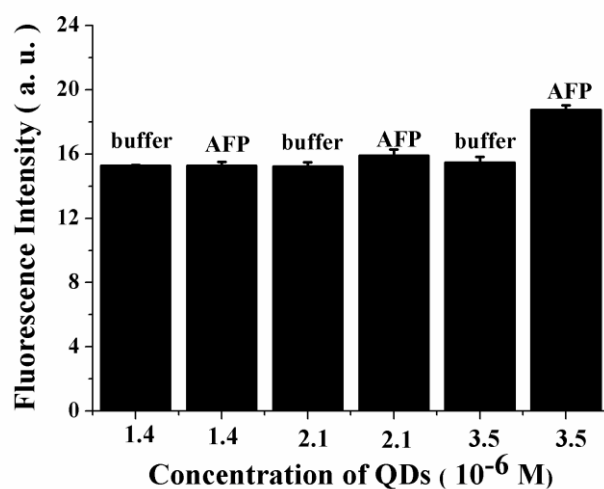

**Fig. S3** The data of fluorescence recovery of QDs in the absence and presence of AFP under different QDs concentration. The concentrations of QDs were (A)  $1.4 \times 10^{-6}$  M, (B)  $2.1 \times 10^{-6}$  M, (C)  $3.5 \times 10^{-6}$  M. The concentrations of Ru-Ab and AFP were 0.3 mg/ml and  $1 \mu\text{g/ml}$ .

### Supplementary Figure S4

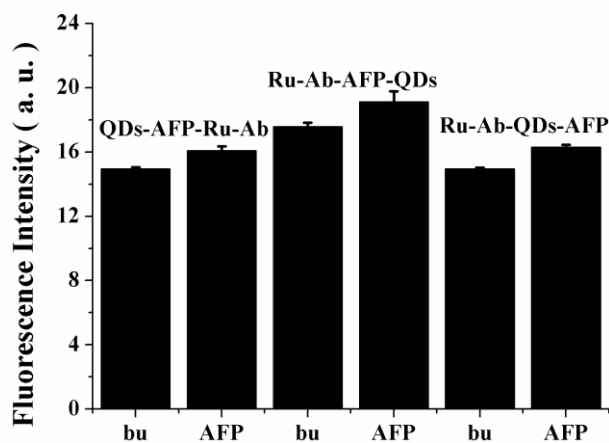

**Fig. S4** The data of fluorescence recovery of QDs in the absence and presence of AFP under different mixing order. The concentrations of QDs, Ru-Ab and AFP were  $3.5 \times 10^{-6}$  M, 0.3 mg/ml

and 0.01 µg/ml. The VRs of QDs-Ru-Ab was 1:3.

### Supplementary Figure S5

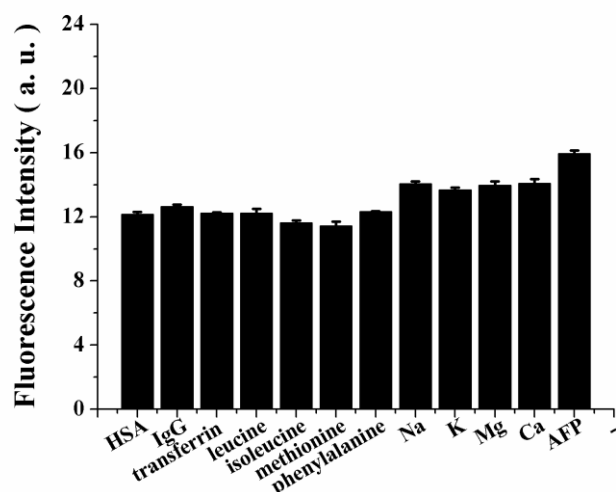

**Fig. S5** Comparisons of the fluorescence recovery of QDs in the presence of diverse analytes and AFP. Other experimental conditions were the same as Fig. 8.

**Table S1** Comparisons of the linear range, detection limit and detection time of several analytical methods for AFP.

| References                             | Linear range (µg/L) | Detection limit (µg/L) | Detection time (min) | Detection scheme               |
|----------------------------------------|---------------------|------------------------|----------------------|--------------------------------|
| Anal. Chem. 2006, 78, 1104-1106        | ————                | 11.7                   | 150                  | Fluorescence Quenching         |
| Anal. Chem. 2009, 81, 8230-8235        | ————                | 1                      | ~ 9                  | Laser-Induced Fluorescence     |
| Chem. Eur. J. 2009, 15, 4704-4709      | 0.1-5               | 0.01                   | ~30                  | Chemiluminescence              |
| J. Am. Chem. Soc. 2011, 133, 686-688   | 0.8-45              | 0.41                   | ~10                  | PLNPs FRET<br>Inhibition assay |
| Sens. Actuators, B. 2011, 156, 388-394 | 0.2-200             | 0.067                  | 275                  | Electrochemical immunosensor   |

|                                              |                            |                  |           |                                                                                                     |
|----------------------------------------------|----------------------------|------------------|-----------|-----------------------------------------------------------------------------------------------------|
| Anal. Chim. Acta.<br>2011, 686,115-120       | 5-70                       | 2.5              | 60        | Chemiluminescence<br>resonance energy<br>(CRET)                                                     |
| Acs Nano. 2010, 4,<br>488-494                | 0.0038-3800<br>(25fM-25nM) | 0.038<br>(250fM) | 1560      | Microfluidic Protein<br>Chip and QDs                                                                |
| Lab. Chip. 2010, 10,<br>3335-3340            | 0.1                        | _____            | 45        | 3-Dhydrogel pillars<br>chip                                                                         |
| Biosens. Bioelectron.<br>2008, 23, 1319-1325 | _____                      | 1                | ~54       | Electrical detection in<br>PDMS-glass<br>microbiochip                                               |
| Anal. Chim. Acta.<br>2009, 650, 77-82        | 0.001-0.5                  | 0.001            | 1660      | Microchip-based<br>ELISA strategy,<br>Chemiluminescence                                             |
| Biomed.Microdevices.<br>2009, 11, 213-216    | 1-800                      | 0.23             | 15.5      | Chemiluminescence                                                                                   |
| Sens. Actuators, B.<br>2008, 128, 349-358    | 0.001-1                    | _____            | 20        | Fluorescence                                                                                        |
| Lab. Chip. 2010, 10,<br>2527-2533            | 0.001                      | _____            | _____     | Capillary<br>electrophoresis                                                                        |
| Anal. Biochem, 2009,<br>388, 306-311         | _____                      | 0.1              | ~10       | Electrophoresis                                                                                     |
| Electrophoresis 2008,<br>29, 3466-3476       | 0.001-0.1                  |                  | 55        | Microchip-based<br>multiplex<br>electro-immunosensing<br>colorimetric<br>immunosensor in<br>droplet |
| <b>This method</b>                           | <b>0.5-1000</b>            | <b>0.06</b>      | <b>~4</b> |                                                                                                     |
